1 **TITLE PAGE**

2 **Title**

3 Micronutrient deficiencies and the double burden of malnutrition in Vietnamese female  
4 adolescents: a national cross-sectional study in 2020

5 **Authors**

6 Xiaomian Tan<sup>1</sup>, Pui Yee Tan<sup>1</sup>, Somphos Vicheth Som<sup>1,2</sup>, Son Duy Nguyen<sup>3,4</sup>, Do Thanh Tran<sup>4</sup>,  
7 Nga Thuy Tran<sup>5</sup>, Van Khanh Tran<sup>5</sup>, J. Bernadette Moore<sup>1</sup> and Yun Yun Gong<sup>1</sup>

8 **Author affiliations**

9 <sup>1</sup>School of Food Science and Nutrition, University of Leeds, Leeds, UK

10 <sup>2</sup>Section of International Health, Department of Health Sciences, Vrije Universiteit  
11 Amsterdam, Amsterdam, The Netherlands

12 <sup>3</sup>Division of Human Nutrition and Health, Wageningen University and Research,  
13 Wageningen, The Netherlands

14 <sup>4</sup>Nutrition Surveillance and Policy Department, National Institution of Nutrition, 48B Tang  
15 Ba Ho, Hai Ba Trung District, Ha Noi, Vietnam

16 <sup>5</sup>Department of Micronutrient, National Institution of Nutrition, 48B Tang Ba Ho, Hai Ba  
17 Trung District, Ha Noi, Vietnam

18

19 **Corresponding author**

20 J Bernadette Moore,

21 School of Food Science and Nutrition,

22 University of Leeds,

23 Leeds,

24 West Yorkshire

25 LS2 9JT

26 T: +44(0) 113-34-39900

27 E: J.B.Moore@leeds.ac.uk

28 **ABSTRACT**

29 **Background** Vietnam is facing a double burden of malnutrition, with increasing prevalence of  
30 overweight coexisting with undernutrition (stunting or thinness) and micronutrient deficiencies  
31 (MNDs). Although malnutrition during female adolescence leads to poor health outcomes with  
32 potential intergenerational effects on offspring, no studies have comprehensively investigated  
33 MNDs and nutritional status among contemporary Vietnamese female adolescents.

34 **Methods** Data from 10- to 18-year-old female participants (n=1,471) in the nationally-  
35 representative Vietnam General Nutrition Survey 2020 were analysed. Blood nutritional  
36 biomarkers, anthropometric measurements, and socio-demographic data were collected and the  
37 associations between nutrition status and MNDs were analysed; with anaemia, iron deficiency  
38 (ID), iron deficiency anaemia, low serum zinc, low serum retinol, and any MNDs as specified  
39 outcomes.

40 **Findings** Prevalence of overweight, stunting, and thinness was 27.2%, 14.3%, and 6.9%,  
41 respectively. Low serum zinc was common (39.8%), as was ID (9.8%). Bivariate analyses  
42 showed that older age (16-18 years old), ethnic minority, lower wealth index, and inflammation  
43 were associated with MNDs. In adjusted logistic regressions, stunting was associated with  
44 increased odds ratio (AOR) and [95% confidence intervals] of low serum retinol (8.92 [2.26,  
45 35.15],  $p<0.01$ ), as was thinness (12.25 [3.47, 43.33],  $p<0.01$ ). Stunting was also associated  
46 with increased odds of having any MNDs (1.88 [1.13, 3.12],  $p<0.05$ ).

47 **Interpretation** More female adolescents were overweight than undernourished in Vietnam in  
48 2020. However, undernutrition, low serum zinc, and ID remain prevalent. Food systems  
49 approaches should be considered to stem the stark increase in the double burden of malnutrition  
50 in young people living in Vietnam.

51 **Funding** UK BBSRC BB/T008989/1.

52

53 **KEYWORDS**

54 Micronutrient deficiency; double burden of malnutrition; adolescents; iron; zinc; vitamin A

55

## 56 **RESEARCH IN CONTEXT**

### 57 **Evidence before this study**

58 Malnutrition during female adolescence leads to poor health outcomes and has the potential for  
59 intergenerational effects on offspring. We searched PubMed from inception to February 1, 2024  
60 for studies that had investigated micronutrient deficiencies (MNDs) or nutritional status (both  
61 over and undernutrition) in female adolescents living in Vietnam using the search terms  
62 “Vietnam\*” and (“female\*” or “girl\*”) and “adolescent\*” and (“double burden of malnutrition”  
63 or “micronutrient\*” or “iron” or “zinc” or “vitamin A” or “overweight” or “obese” or “thinness”  
64 or “stunting” or “underweight”) with no language restriction. Of 188 studies identified, 104  
65 had been published in last 10 years. These studies most frequently reported regional-specific  
66 data on body weight (City Ho Chi Minh or specific rural areas), as well as results from the  
67 Vietnamese cohorts in the Young Lives prospective cohort study which included children born  
68 in either 1994/5 or 2001/2 and were followed longitudinally for over 15 years since 2001.  
69 Although a few studies reported on the prevalence of stunting and iron deficiency in  
70 comparison with other Southeast Asian countries, we found no studies that had  
71 comprehensively investigated both micronutrient and nutritional status in contemporary  
72 Vietnamese adolescents.

### 73 **Added value of this study**

74 This is the first study to report the prevalence of micronutrient deficiencies and the double  
75 burden of malnutrition in female adolescents living in Vietnam in 2020. Our study highlights  
76 the current double burden of malnutrition in Vietnam, with a higher prevalence of overweight  
77 (27.2%) than undernutrition (stunting and thinness combined at 21.2%) existing among  
78 contemporary female adolescents. In addition, our results show regional, residential, ethnic,  
79 and wealth index disparities in undernutrition and MNDs. Not least, our study suggests that  
80 iron deficiency and low serum zinc levels remain prevalent among Vietnamese female  
81 adolescents.

### 82 **Implications of all the available evidence**

83 Additional efforts on targeted supplementation, food fortification, food-based interventions,  
84 and nutrition education should be made for at risk female adolescents living in Vietnam. Food  
85 environment and food systems approaches should be considered to stem the recent stark  
86 increase in overweight in young people living in Vietnam and other Western Pacific nations  
87 newly facing the double burden of malnutrition.

## 88 INTRODUCTION

89 While considerable progress has been made in reducing the global burden of micronutrient  
90 deficiencies (MNDs) in recent decades, the prevalence of MNDs remains high in some  
91 populations.<sup>1</sup> Concerningly, an estimated 56% of children under five years of age, and 69% of  
92 women of reproductive age (WRA, 15-49 years) globally are affected by at least one of a few,  
93 very common, MNDs.<sup>2</sup> In particular, iron, zinc, and vitamin A deficiencies are the most  
94 common MNDs worldwide, and are causally associated with adverse health outcomes and the  
95 global burden of disease.<sup>1,2</sup> Following infants and toddlers, female adolescents represent one  
96 of the most susceptible developmental and population age groups to MNDs.<sup>3</sup>

97 Indeed, after infancy and early childhood, adolescence is increasingly recognised as a unique  
98 and critical period for human growth and development, with profound hormonal, physical, and  
99 psychosocial changes.<sup>4</sup> Poor nutrition during adolescence impacts full height development,  
100 quality of later life; and, in the case of adolescent females, has intergenerational effects on  
101 offspring that perpetuate an ongoing cycle of malnutrition.<sup>3,4</sup> Approximately 1.8 billion  
102 individuals worldwide are adolescents between 10–19 years old, with 90% of them living in  
103 low- and middle-income countries (LMICs).<sup>4</sup> In general, females have higher risk of MNDs  
104 such as iron deficiency (ID) and iron deficiency anaemia (IDA). This is because in addition to  
105 differences in reproductive biology, females are more susceptible to discriminative cultural,  
106 social, and gender norms.<sup>3,4</sup> These discriminatory norms manifest in increased poverty, illiteracy,  
107 inequality, and early marriage, which individually and collectively increase risk for MNDs in  
108 female adolescents globally, and often particularly in LMICs.

109 Similar to other LMICs, Vietnam is facing a double burden of malnutrition, that is, the co-  
110 existence of under- and overnutrition at community and country levels.<sup>5</sup> Economic  
111 development and rapid changes to food environment have resulted in a nutrition transition with  
112 a marked increase in the prevalence of overweight and obesity in childhood.<sup>5,6</sup> Among 5–19-  
113 year-olds in Vietnam, the prevalence of overweight and obesity increased from 8.5% (2010) to  
114 19% (2020).<sup>7</sup> In Ho Chi Minh city, although the prevalence of stunting and thinness has  
115 decreased in recent decades, nonetheless undernutrition remained high at 6-14% for high  
116 school students in 2014; while 19% were overweight or obese.<sup>5</sup> Similarly, although multiple  
117 national nutrition strategies aimed at improving population micronutrient status have been  
118 implemented,<sup>8,9</sup> with consequent reductions in some MNDs, nonetheless the prevalence of  
119 some MNDs remains stubbornly high. For example, the pooled prevalence of anaemia in  
120 Vietnamese WRA decreased from 42.6% (1995) to 16.9% (2013),<sup>10</sup> but in 2010 zinc  
121 deficiency was noted to still be of severe public health significance, with more than 60% of  
122 WRA and children in Vietnam having low serum zinc.<sup>11</sup>

123 Given the rapid nutrition transition unfolding in Vietnam, the aims of this study were to  
124 examine: 1) the prevalence of different forms of malnutrition including undernutrition,  
125 overnutrition and MNDs (ID, low serum zinc and retinol); and 2) the associations between  
126 MNDs, demographic and socioeconomic factors, and growth indices; in female adolescents  
127 aged 10-18 years old, utilising the data from the nationally-representative, Vietnam General  
128 Nutrition Survey (GNS) 2020. Our hypothesis was that abnormal growth indices increase the  
129 risk of having MNDs.

## 130 **METHODS**

### 131 **Study design**

132 To understand the associations between MNDs and growth indices, GNS2020 data were  
133 analysed following the Strengthening the Reporting of Observational studies in Epidemiology  
134 (STROBE) guidelines. Conducted by the National Institute of Nutrition of Vietnam every 10  
135 years, the GNS is a nationally-representative, population-based, cross-sectional survey that  
136 combines anthropometric and blood biomarker measurements with comprehensive  
137 sociodemographic data. In order to prevent selection bias, participants were recruited using a  
138 multi-stage cluster sampling design based on geographical areas, as detailed (currently in  
139 Preprint).<sup>12</sup> Of the 20,864 participants completing the GNS 2020, a total of 1,471 participants  
140 met our inclusion criteria of being aged 10- to 18-years-old and female, were included in this  
141 study for analysis.

### 142 **Anthropometric measurements**

143 Procedures for taking participant's height and weight measurements in the GNS 2020 have been  
144 described in detail in our Preprint.<sup>12</sup> Body mass index (BMI) was calculated as weight (kg)  
145 divided by square of height (m<sup>2</sup>). The World Health Organization (WHO) growth reference was  
146 used to define stunting, thinness, and overweight.<sup>13</sup> Stunting was defined by height-for-age z-  
147 score (HAZ) < -2 SD, while thinness and overweight were defined by BMI-for-age z score  
148 (BAZ) < -2 SD; and BAZ > +1, respectively. Outliers with HAZ > +6 SD or < -6 SD, or BAZ >  
149 +5 SD or < -5 SD were excluded from the dataset.

### 150 **Blood biomarkers and definition of micronutrient deficiencies**

151 Blood samples were taken as part of the Vietnam GNS 2020 as detailed (Preprint)<sup>12</sup>.  
152 Biomarkers measured included: haemoglobin by point-of-care assay (HemoCue Diagnostics),  
153 serum ferritin and serum transferrin receptor by electrochemiluminescence immunoassay  
154 (Roche Cobas e 601; Roche Diagnostics), serum zinc by atomic emission spectrometry (MP-  
155 AES 4200, Agilent Technologies), serum retinol and retinol binding protein by high  
156 performance liquid chromatography (Agilent 1200, Agilent Technologies), serum c-reactive  
157 protein (CRP) and serum alpha-1-acid glycoprotein (AGP) using an automated protein analyzer  
158 (BN ProSpec Siemens® System, Siemens Healthineers). The diagnosis of MNDs followed the  
159 International Zinc Nutrition Consultative Group (IZiNCG)'s guidelines (for low serum zinc)  
160 and the WHO micronutrient survey manual (for other MNDs).<sup>14,15</sup> Anaemia was defined as  
161 haemoglobin concentration levels <115 g/L and <120 g/L for 10-11 years old and 12-18 years  
162 old, respectively. For ID, the cut offs of serum ferritin concentration <15µg/L and 70µg/L were  
163 applied for apparently healthy individuals and individuals with infection or inflammation  
164 (CRP >5mg/L and/or AGP >1mg/L), respectively. IDA was defined as the co-existence of  
165 anaemia and ID. Low serum zinc was defined as serum zinc under different conditions: serum  
166 zinc <10·7µmol/L (morning, fasting), <10·1µmol/L (morning, non-fasting) or <9·0µmol/L  
167 (afternoon, non-fasting). Low serum retinol was defined as serum retinol concentration  
168 <0·70µmol/L. Any MNDs were defined as having at least one of any of the MNDs described  
169 above (ID, low serum zinc, and low serum retinol) and were reported as having 1 or ≥2 MNDs.  
170 To avoid bias in measurement, in addition to utilising the aforementioned standardised  
171 definitions and cut-offs from WHO and IZiNCG, within-assay and between-assay variability  
172 tests were performed for quality control of the biomarker measurements.

## 173 **Demographic and socioeconomic indicators**

174 Demographic and socioeconomic data were collected using structured questionnaires. These  
175 included age, gender, geographical regions (Northern mountains, Delta and Hanoi, North  
176 Central and Central Coast, Highlands, Southeast and City Ho Chi Minh, and Mekong Delta),  
177 urban or rural demographics, ethnicity (Kinh or a minority ethnic group, e.g. Tay, Thai, Muong,  
178 Khmer, Nung, Hmong or other), and household wealth index (quintiles). The details of the  
179 wealth index calculation have been reported (preprint).<sup>12</sup>

## 180 **Statistical analyses**

181 Descriptive and logistic regression analyses were performed using STATA 17 (Stata  
182 Corporation, College Station, TX, US). All analyses were performed based on sampling  
183 weights, using the svy prefix. The number and percentage of missed observations within each  
184 variable are listed in **Table S1**. Quantitative data are presented as mean  $\pm$  SD for continuous  
185 variables and number (%) for categorical variables, with the exception of serum ferritin levels,  
186 which are presented as geometric mean. Given the large sample size, the Wald and Chi-Square  
187 tests were performed on continuous and categorical variables, respectively, to assess the  
188 difference of characteristics of participants among nutritional status, unless specific noted.  
189 Bivariate logistic regression was performed to assess the associations between MNDs  
190 (outcomes) and growth indices and demographic and socioeconomic indicators. Multivariate  
191 logistic regression was used to investigate the associations between micronutrient status and  
192 growth indices, after adjusting for confounders: age group (done categorically for groups 10-  
193 12, 13-15, 16-18 years old), inflammation and sociodemographic factors (area of residence,  
194 ethnicity and wealth index). Crude (COR) and adjusted odds ratio (AOR) with 95% confidence  
195 intervals (CI) were reported for binominal outcomes (5 individual MNDs), while crude (CRR)  
196 and adjusted relative risk (ARR) with 95% CI were reported for multi-nominal outcomes (any  
197 1 or more of any MNDs). Significant level was set to 0.05. Sensitivity analyses were done by:  
198 1) comparing subsamples (50% of the total population, randomly picked) with the total sample;  
199 and 2) testing 2 different logistic regression models with or without inflammation status as a  
200 covariate. Data visualisation was conducted using ggplot2 in the R environment (R-4.2.3).

## 201 RESULTS

### 202 Characteristics of participants

203 Data from 1,471 female adolescent participants in the Vietnam GNS 2020, aged 10-18 years  
204 old were included in this study. The overall prevalence of overweight, stunting, and thinness  
205 was 27.2%, 14.3%, and 6.9%, respectively (**Table 1**). Sociodemographic factors investigated  
206 in relation to nutritional status included geographical areas, urban or rural areas, ethnicity, and  
207 wealth index. These were all associated with stunting ( $p < 0.01$ , **Table 1**). Stunting was more  
208 prevalent in: adolescents living in northern mountains, north central & central coast and  
209 highlands; rural areas; ethnic minorities; and those living in households with a low wealth index.  
210 In contrast, high prevalence of overweight (24.4%) and thinness (22.4%) was found among  
211 females who lived in Delta and Hanoi. Prevalence of overweight was low in Northern  
212 mountains (8.6%) while thinness prevalence (15.3%) was high in this area (**Table 1**). The  
213 average age of the study participants was  $12.8 \pm 2.2$  years old, although adolescents with  
214 stunting were older than those without stunting ( $13.3 \pm 2.6$  vs  $12.6 \pm 2.1$ ,  $p < 0.01$ ). While thin  
215 adolescents were younger than those with normal weight ( $12.1 \pm 2.0$  vs  $13.0 \pm 2.2$ ,  $p < 0.01$ ).

216 Interestingly, no differences were observed in the levels of serum biomarkers between stunted  
217 and non-stunted adolescents (**Table 2**). However, both serum retinol and retinol binding protein  
218 levels were significantly lower in adolescents who were thin compared to those with normal  
219 weight ( $p < 0.01$ , **Table 2**). While 5.9% of participants exhibited markers of either acute or  
220 chronic inflammation, these indicators did not vary significantly in relation to nutritional status.  
221 No differences were observed in blood biomarkers between the overweight and normal weight  
222 groups. Notably, serum ferritin levels were higher in participants with thinness ( $p < 0.01$ ), but  
223 remarkably ID was not associated with body weight status (**Table 2**). Prevalence of low serum  
224 retinol was much higher in adolescents with thinness compared to those with overweight and  
225 normal weight (7.0% versus 1.7% and 0.8%;  $p < 0.01$ ); and was found more prevalent among  
226 adolescents with stunting than those who were not stunted (3.8% versus 1.0%,  $p = 0.04$ ).  
227 Moreover, having any individual or combination of MNDs were associated with stunting  
228 ( $p < 0.01$ ) but not thinness or overweight (**Table 2**).

### 229 Prevalence of malnutrition and micronutrient deficiencies

230 Notable differences in nutritional status and MNDs emerged when participants were stratified  
231 into early-adolescent (10-12 years old), middle-adolescent (13-15 years old) and late-  
232 adolescent (16-18 years old) age groups (**Figure 2**). Prevalence of both overweight and thinness  
233 was higher in early-adolescents compared to late adolescents (29.7% versus 22.0%, 9.4%  
234 versus 2.7%, respectively; **Figure 2A**). Whereas, compared to early-adolescents, the  
235 prevalence of stunting was higher in the late adolescent group (26.8% versus 12.4%; **Figure**  
236 **2A**). Anaemia prevalence was lowest in the early-adolescent group (6.8%), but more common  
237 in late adolescents (14.1%; **Figure 2B**). Similarly, the prevalence of IDA was dramatically  
238 higher in middle- (5.6%) and late- (9.0%) adolescents in comparison to early-adolescent  
239 females (2.1%; **Figure 2B**). Both ID and low serum zinc were more prevalent in the late  
240 adolescents, whereas low serum retinol was less prevalent in the oldest group (**Figure 2C**).  
241 Low serum zinc was the most common MND, affecting 39.8% of the study participants,  
242 particularly in late adolescents (47.7%; **Figure 2C**). Only 1.5% of the female adolescents had  
243 low serum retinol levels (**Figure 2C**). When we examined the existence of any MNDs, nearly  
244 half (45.6%) of all female adolescents in the GNS 2020 had at least one MND (**Figure 2D**).

245 The prevalence of having  $\geq 1$  MNDs was lowest in early adolescents (43.8%) and highest in  
246 late adolescents (55.6%; **Figure 2D**). Notably late adolescents had a much higher prevalence  
247 of having 2 MNDs (11.3%) compared to early adolescents (3.0%). Only a very small  
248 proportion (0.3%) of study participants had three MNDs (**Figure 2D**).

249 Unsurprisingly, stark differences in the nutritional status and prevalence of MNDs existed  
250 between adolescents from rural areas in comparison to urban areas (**Figure S1-3**). The  
251 prevalence of overweight was much higher in adolescents from urban areas (33.7 versus 23.6%  
252 in rural areas; **Figure S1**), while stunting prevalence was much higher in females from rural  
253 areas (17.4 versus 8.3%; **Figure S1**). The prevalence of having any MNDs was higher in all  
254 age groups from rural areas compared to those from urban areas (**Figures S2 and S3**).

### 255 **Associations between micronutrient deficiencies and demographic, socioeconomic** 256 **indicators and growth indices**

257 Logistic regressions were performed to examine the association between MNDs (individually  
258 and combined) and age, ethnicity, area of residence, wealth index and growth indices (**Table**  
259 **3**). The associations between MNDs and growth indices were further estimated while adjusting  
260 for other variables that showed significant association with MNDs and variables reported to be  
261 risk factors of MNDs in previous studies (**Table 4**).

262 Our findings from bivariate logistic regression showed that while female adolescents aged 13-  
263 15 years old had increased odds of ID (COR = 2.93 [1.68, 5.12],  $p < 0.01$ ), those aged 16-18  
264 had much higher odds of having IDA (COR = 4.55 [1.94, 10.68],  $p < 0.01$ ), and more than one  
265 MND (COR = 4.55 [1.27, 16.28],  $p < 0.01$ ; **Table 3**). Inflammation status was associated with  
266 increased odds of anaemia (COR = 2.03 [1.03, 4.01],  $p < 0.05$ ), ID (COR = 4.11 [2.18, 7.76],  
267  $p < 0.01$ ), and low serum retinol (COR = 7.86 [1.61, 38.30],  $p < 0.05$ ), but had no impact on  
268 odds of low serum zinc (**Table 3**). Ethnic minorities had increased odds of low serum zinc  
269 (COR = 1.63 [1.08, 2.47],  $p < 0.05$ ); whereas female adolescents from the wealthiest quintile  
270 were significantly protected against IDA (COR = 0.42 [0.22, 0.81],  $p < 0.05$ ). Interestingly, no  
271 significant association was found between MNDs and rural or urban areas of residence.

272 In the multivariate logistic regression models, after adjusting for age, ethnicity, area of  
273 residence, wealth index and inflammation; stunting and thinness were associated with  
274 increased odds of low serum retinol (stunting: AOR: 8.92 [2.26, 35.15],  $p < 0.01$ ; thinness:  
275 AOR: 12.25 [3.47, 43.33],  $p < 0.01$ ). In addition, stunting increased odds of having at least one  
276 MND (AOR: 1.88 [1.13, 3.12],  $p < 0.05$ ) compared to those without any MNDs (**Table 4**).  
277 However, it is important to note that the prevalence of low serum retinol among the study  
278 participants was extremely low (1.5%,  $n=16$ ; **Table 4**), thus these results should be interpreted  
279 with caution. The findings also suggest a marginally significant protective effect of thinness  
280 against the odds of ID (AOR: 0.22 [0.05, 0.99],  $p=0.049$ ). We found no significant impact of  
281 any growth indices on the odds of low serum zinc (**Table 4**). In the unadjusted bivariate logistic  
282 regression, overweight appeared protective against low serum zinc (COR: 0.76 [0.59, 0.99],  
283  $p=0.04$ ; **Table 3**). However, this association disappeared after adjusting for covariates (**Table**  
284 **4**). Similarly, no significant association was found between overweight and any MNDs in the  
285 multivariate logistic regression models. The results of secondary analysis on the randomly  
286 generated subsamples (50%) were consistent with the results on the full dataset reported above.



## 287 DISCUSSION

288 This is the first study to investigate the prevalence and associations between MNDs and  
289 nutritional status (i.e., both under- and overnutrition), in contemporary female adolescents living  
290 in Vietnam. Our data starkly illustrate the current double burden of malnutrition in Vietnam,  
291 highlighting a high prevalence of overweight (27%) co-existing alongside undernutrition  
292 (approximately 22%; combined prevalence of stunting (14.3%) and thinness (6.9%)) among  
293 female adolescents. Low serum zinc was the most commonly observed MND, affecting 40%  
294 of participants in this cross-sectional cohort, followed by ID (9.8%). In contrast, low serum  
295 retinol was rarely observed (1.5%). Notably, stunting significantly increased the risk of having  
296 any MND (ARR: 1.88 [1.13, 3.12]), and the prevalence of stunting still predominated over  
297 overweight (26.8% versus 22%) in late adolescent females aged 16-18 years old living in  
298 Vietnam in 2020.

299 Between 2010 and 2020 the prevalence of overweight in children and young people (5-19 years  
300 old) living in Vietnam was estimated to have more than doubled (8.5 to 19%).<sup>7</sup> Strikingly, our  
301 study suggests an even higher prevalence of overweight among female adolescents living in  
302 Vietnam between 2019 and 2020, reaching 27%. This is higher than most LMICs in the South-  
303 Eastern Asia region,<sup>7</sup> and likely stems from a marked nutrition transition in Vietnam that has  
304 come secondary to a period of rapid and sustained economic growth with large increases in  
305 household wealth.<sup>7,16,17</sup> Our study illustrates the scale of the double burden of malnutrition in  
306 female adolescents in Vietnam, as a comparable percentage of participants in this nationally-  
307 representative survey were underweight as overweight. This emergent public health problem  
308 has been prioritised in the National Nutrition Strategy for 2021-2030.<sup>16</sup>

309 Significant demographic differences were observed between stunted and non-stunted  
310 adolescents, this included participant's areas of residence (urban versus rural), geographical  
311 regions, ethnicity, and wealth index. These factors are often interrelated, as in Vietnam many  
312 ethnic minorities live in rural or mountainous areas, with limited education, household income  
313 and diet choice. Minority groups are much more likely to live in moderate or severe food  
314 insecurity, and have less access to health care services including vaccinations, as well as the  
315 improved sanitation and water supply found in urban regions.<sup>16,18</sup> Ethnic minorities  
316 consequently have a higher prevalence of parasitic infections and diarrhea, leading to increased  
317 risk of stunting in early childhood (under 5 years of age).<sup>19</sup> Therefore, in the Vietnam Nutrition  
318 Strategy 2021-2030, ethnic minorities were seen as a critical target population to be  
319 individually evaluated for most nutrition targets.<sup>16</sup> Our data showing that wealth index was  
320 higher in non-stunted adolescents aligns with previous research that linked household wealth  
321 to protection from childhood stunting in developing countries including Vietnam.<sup>20</sup>

322 Interestingly, we found no significant association between body weight status (thinness, normal,  
323 or overweight) and either wealth index, ethnicity, geographical regions, or areas of residence.  
324 That is, the results show a high prevalence of overweight among Vietnamese female  
325 adolescents irrespective of their sociodemographic factors. These data are in contrast to the  
326 Young Lives study (Vietnamese older cohort), which found the children within the top tertile  
327 of household wealth had a much higher relative risk (RR) of overweight and obesity in  
328 comparison to those in the bottom tertile, albeit with a wide 95% confidence interval (RR: 9.11  
329 [1.07, 77.42]).<sup>21</sup>

330 In addition to negatively impacting immune function and increasing the risk of morbidity for  
331 the adolescents themselves, MNDs, in female adolescents in particular, can lead to  
332 intergenerational consequences through shaping fetal programming, development in early life,  
333 and the cardiometabolic health of the offspring in the long term.<sup>3</sup> Our study highlights a high  
334 prevalence of low serum zinc levels and ID in Vietnamese female adolescents, with those from  
335 higher household wealth being protected from ID, IDA, and all-cause anaemia. The much lower  
336 prevalence of low serum retinol may be attributed to the universal high dose vitamin A  
337 supplement programs (100,000 IU) for children aged 6-36 months, which have been  
338 implemented in Vietnam since 1988.<sup>22</sup> Female adolescents from minority ethnic groups were  
339 more likely to have low serum zinc, likely related to both increased prevalence of food  
340 insecurity, infections, and diarrhea, as well as consumption of more staple and starchy foods  
341 that are lower in essential micronutrients.<sup>18</sup>

342 Although with economic growth, the dietary pattern of Vietnamese has changed to include  
343 more meat, vegetables and less starchy food at a national level, stark differences in household  
344 expenditure on food groups exist between ethnic minority, rural, and poorer households.<sup>6,18</sup>  
345 Additionally, although the GNS 2020 followed international guidelines for defining MNDs  
346 (e.g., adjusting ferritin thresholds based on CRP and AGP measurements for inflammation, and  
347 adjusting cut-offs for low serum zinc depending on sample type (i.e. fasted versus non-fasted)  
348 and sample collection time); nonetheless, we caution multiple challenges with MND  
349 assessment and zinc status measurement in particular exist.<sup>23</sup> For example, serum zinc levels  
350 may be transiently lowered in acute infection or inflammation, which can lead to  
351 overestimation of deficiency. Conversely, haemolysis or contamination from adventitious zinc  
352 in the environment could mask low serum values.

353 Notably, we found that MNDs were generally more prevalent among older adolescents (16-18  
354 years old), which may reflect increased demands for both micro- and macronutrients during  
355 growth spurts and sex maturation during puberty.<sup>24,25</sup> In addition, repeated blood loss during  
356 menstruation will deplete iron stores particularly for females with limited access to iron-rich  
357 foods, or who have low iron absorption, which leads to ID with or without anaemia.<sup>26,27</sup> In this  
358 study, we did not find any association between overweight and MNDs, although overweight,  
359 in particular obesity, has been shown to increase risk for ID in children and young people in  
360 meta-analysis OR=1.51 (1.20, 1.82).<sup>23</sup> The possible explanation could be the extremely low  
361 prevalence of obesity (2.7% in urban and 1.3% in rural area) in our population in comparison  
362 to those included in the meta-analysis, which were from North America and European  
363 populations. Our results match those of Lailou and colleagues,<sup>28</sup> who concluded  
364 overweight/obesity was not a risk factor for ID in a large cohort of Vietnamese women  
365 (n=1526).

366 As with all observational studies, our cross-sectional study has limitations, most notably that it  
367 can not reveal causality. In addition, fewer participants recruited to the GNS 2020 were in late  
368 adolescence, which may limit the interpretation of the logistic regression. This age group  
369 should be a particular focus for data collection in the next GNS survey. Not least, an important  
370 limitation in examining this age group was that due to missing values we could not include  
371 puberty stage as a confounder in regression analyses. Nonetheless, our study had notable  
372 strengths. The GNS 2020 was a nationally-representative population based survey, meaning  
373 our findings can be generalised to female adolescents of the same age group across Vietnam.  
374 Another strength was the measurement of biochemical biomarkers of micronutrient status and

375 inflammation, alongside anthropometric and socio-demographic data. This study provides  
376 unprecedented insights into the current double burden of malnutrition among female  
377 adolescents in Vietnam.

378 In conclusion, our data highlight that more female adolescents were living with overnutrition  
379 than undernutrition in Vietnam in 2020. However, undernutrition and low serum zinc remain  
380 persistently prevalent. Regional, residential, ethnic and wealth disparities in undernutrition and  
381 MND suggest the needs for targeted interventions to ensure equitable access for all and to meet  
382 local needs. These data should aid in prioritizing public health and nutrition education  
383 initiatives, and provides reference points for assessing the effectiveness of future interventions.  
384 Robust, timely and reliable data on the burden of MNDs is essential to inform, design and  
385 implement successful nutrition policies and programmes aimed at reducing malnutrition. Food  
386 environment and food systems approaches should be considered to stem the recent stark  
387 increase in overweight in young people living in Vietnam and other Western Pacific nations  
388 newly facing the double burden of malnutrition.

## 389 **Contributors**

390 XT, PYT, SVS, YYG and JBM designed and conceptualized the study. YYG and JBM  
391 supervised the study. NTT and VKT were responsible for GNS 2020 data curation,  
392 investigation, and methodology. SDN and DTT performed data cleaning and final statistical  
393 analyses. NTT, VKT, SDN and DTT had full access to all the data and took responsibility for  
394 the integrity of the data. XT, PYT and SVS wrote code for formal analyses and performed  
395 statistical analyses on data subsets. XT prepared the tables and figures and original manuscript  
396 draft. JBM critically revised the manuscript and all authors reviewed the manuscript and  
397 approved the submitted final version.

## 398 **Data sharing statement**

399 The GNS 2020 dataset is the property of the National Institute of Nutrition, Vietnam, and is not  
400 publicly available. This secondary analysis was conducted under a partnership agreement  
401 between the University of Leeds and NIN. Requests to access the datasets should be directed  
402 to [ninvietnam@viendinhduong.vn](mailto:ninvietnam@viendinhduong.vn).

## 403 **Ethics statement**

404 Ethical approval was not required for the secondary data analysis in this study. The GNS 2020  
405 was reviewed and approved by the Ethical Committee of the National Institute of Nutrition,  
406 Ministry of Health, Vietnam. All methods were conducted in accordance with the guidelines  
407 laid down in the Declaration of Helsinki and written informed consent was obtained from each  
408 participant prior to data collection by NIN.

## 409 **Declaration of interests**

410 We declare that we have no conflicts of interest.

## 411 **Acknowledgments**

412 This research was funded by the UK Biotechnology and Biological Sciences Research Council  
413 (BBSRC) Global Challenges Research Fund (B/T008989/10). The funders had no involvement  
414 in study design, data analysis or interpretation or decision to submit the paper for publication.  
415 The authors extend their gratitude to extended colleagues in the National Institute of Nutrition,  
416 Ministry of Health, Vietnam, for their roles in the GNS 2020, and huge thank you to the  
417 participants in that survey.

418

419 **FIGURE LEGENDS**

420 **Figure 1 Participants selection flow chart.**

421

422 **Figure 2 Prevalence of malnutrition in female adolescents aged 10-18 years old living in**  
423 **Vietnam in different age groups.** Data show the prevalence of overweight, stunting and  
424 thinness **(a)**, anaemias **(b)**, MNDs **(c)** and distribution of any MNDs (any of ID, low serum  
425 zinc or low serum retinol) **(d)**. Prevalence was estimated based on sampling weight. Dash lines  
426 represented the overall prevalence. ID: iron deficiency; IDA: iron deficiency anaemia; MNDs:  
427 micronutrient deficiencies.

428

## TABLES

**Table 1 Socio-demographic characteristics of female adolescents living in Vietnam between 10 to 18 years old (n=1471).**

|                                                                                                                                                                                                                                                                                                                                                                                                                                                                                                                                                   | Total<br>(n=1471) | Non-stunted<br>(n=1068; 85.7%) | Stunted<br>(n=185; 14.3%) | P value            | NW<br>(n=967; 65.9%) | OW<br>(n=402; 27.2%) | Thinness<br>(n=102; 6.9%) | P value            |
|---------------------------------------------------------------------------------------------------------------------------------------------------------------------------------------------------------------------------------------------------------------------------------------------------------------------------------------------------------------------------------------------------------------------------------------------------------------------------------------------------------------------------------------------------|-------------------|--------------------------------|---------------------------|--------------------|----------------------|----------------------|---------------------------|--------------------|
| Age in years, mean $\pm$ SD                                                                                                                                                                                                                                                                                                                                                                                                                                                                                                                       | 12.8 $\pm$ 2.2    | 12.6 $\pm$ 2.1                 | 13.3 $\pm$ 2.6            | <0.01 <sup>a</sup> | 13.0 $\pm$ 2.2       | 12.6 $\pm$ 2.2       | 12.1 $\pm$ 2.0            | <0.01 <sup>b</sup> |
| <b>Geographical region, n (%)</b>                                                                                                                                                                                                                                                                                                                                                                                                                                                                                                                 |                   |                                |                           |                    |                      |                      |                           |                    |
| Northern mountains                                                                                                                                                                                                                                                                                                                                                                                                                                                                                                                                | 208 (14.5%)       | 132 (13.1%)                    | 57 (30.4%)                | <b>&lt;0.01</b>    | 159 (16.9%)          | 38 (8.6%)            | 11 (15.3%)                | 0.51               |
| Delta and Hanoi                                                                                                                                                                                                                                                                                                                                                                                                                                                                                                                                   | 306 (26.1%)       | 265 (28.5%)                    | 19 (14.1%)                |                    | 233 (27.1%)          | 56 (24.4%)           | 17 (22.4%)                |                    |
| North Central & Central Coast                                                                                                                                                                                                                                                                                                                                                                                                                                                                                                                     | 262 (19.1%)       | 188 (18.2%)                    | 40 (26.6%)                |                    | 174 (19.6%)          | 69 (17.6%)           | 19 (19.8%)                |                    |
| Highlands                                                                                                                                                                                                                                                                                                                                                                                                                                                                                                                                         | 271 (8.0%)        | 151 (6%)                       | 34 (9%)                   |                    | 140 (6.3%)           | 110 (11.9%)          | 21 (9.4%)                 |                    |
| Southeast and City Ho Chi Minh                                                                                                                                                                                                                                                                                                                                                                                                                                                                                                                    | 220 (16.2%)       | 168 (15.8%)                    | 16 (10.4%)                |                    | 138 (14.9%)          | 74 (21.4%)           | 8 (8.2%)                  |                    |
| Mekong Delta                                                                                                                                                                                                                                                                                                                                                                                                                                                                                                                                      | 204 (16.1%)       | 164 (18.4%)                    | 19 (9.5%)                 |                    | 123 (15.1%)          | 55 (16.1%)           | 26 (25%)                  |                    |
| <b>Area of residence, n (%)</b>                                                                                                                                                                                                                                                                                                                                                                                                                                                                                                                   |                   |                                |                           |                    |                      |                      |                           |                    |
| Urban                                                                                                                                                                                                                                                                                                                                                                                                                                                                                                                                             | 614 (35.7%)       | 454 (36.2%)                    | 48 (19.5%)                | <b>&lt;0.01</b>    | 377 (32.3%)          | 199 (44.2%)          | 38 (34.1%)                | 0.10               |
| Rural                                                                                                                                                                                                                                                                                                                                                                                                                                                                                                                                             | 857 (64.3%)       | 614 (63.8%)                    | 137 (80.5%)               |                    | 590 (67.7%)          | 203 (55.8%)          | 64 (65.9%)                |                    |
| <b>Ethnicity, n (%)</b>                                                                                                                                                                                                                                                                                                                                                                                                                                                                                                                           |                   |                                |                           |                    |                      |                      |                           |                    |
| Kinh                                                                                                                                                                                                                                                                                                                                                                                                                                                                                                                                              | 1171 (82.2%)      | 907 (87.7%)                    | 96 (58.8%)                | <b>&lt;0.01</b>    | 768 (82.9%)          | 325 (80.6%)          | 78 (81.6%)                | 0.82               |
| Minorities                                                                                                                                                                                                                                                                                                                                                                                                                                                                                                                                        | 300 (17.8%)       | 161 (12.3%)                    | 89 (41.2%)                |                    | 199 (17.1%)          | 77 (19.4%)           | 24 (18.4%)                |                    |
| <b>Wealth index, n (%)</b>                                                                                                                                                                                                                                                                                                                                                                                                                                                                                                                        |                   |                                |                           |                    |                      |                      |                           |                    |
| Lowest                                                                                                                                                                                                                                                                                                                                                                                                                                                                                                                                            | 247 (17.5%)       | 149 (15.5%)                    | 67 (31.8%)                | <b>&lt;0.01</b>    | 177 (18.6%)          | 53 (14.6%)           | 17 (18%)                  | 0.71               |
| Second                                                                                                                                                                                                                                                                                                                                                                                                                                                                                                                                            | 304 (17.4%)       | 211 (17%)                      | 48 (22.2%)                |                    | 187 (17%)            | 87 (17.2%)           | 30 (22.1%)                |                    |
| Third                                                                                                                                                                                                                                                                                                                                                                                                                                                                                                                                             | 323 (22.2%)       | 228 (21.7%)                    | 34 (23.9%)                |                    | 198 (21.3%)          | 100 (22.9%)          | 25 (27.9%)                |                    |
| Fourth                                                                                                                                                                                                                                                                                                                                                                                                                                                                                                                                            | 351 (25.2%)       | 273 (26.3%)                    | 22 (14.5%)                |                    | 227 (24.6%)          | 109 (27.8%)          | 15 (20.2%)                |                    |
| Highest                                                                                                                                                                                                                                                                                                                                                                                                                                                                                                                                           | 246 (17.8%)       | 207 (19.4%)                    | 14 (7.7%)                 |                    | 178 (18.5%)          | 53 (17.5%)           | 15 (11.8%)                |                    |
| <p>Data are presented as mean <math>\pm</math> SD for continuous variables and n (%) for categorical variables.<br/> Wald test and Chi square test were performed for continuous variables (age in year) and categorical variables (Geographical region, area of residence, ethnicity and wealth index), respectively.<br/> <sup>a</sup>P value was calculated comparing with non-stunted group using Wald test; <sup>b</sup>P value calculated comparing thinness group with NW group, by Wald test.<br/> NW: normal weight; OW: overweight.</p> |                   |                                |                           |                    |                      |                      |                           |                    |

**Table 2 Anthropometric, biochemical characteristics and micronutrient status of female adolescents living in Vietnam between 10 to 18 years old (n=1471).**

|                                                                                                                                                                                                                                                                                                                                                                                                                                                                                                                                                                                                                                                                                                                                                                                                                          | Total<br>(n=1471) | Non-stunted<br>(n=1068; 85.7%) | Stunted<br>(n=185; 14.3%) | P value <sup>a</sup> | NW<br>(n=967; 65.9%) | OW<br>(n=402;<br>27.2%) | P value <sup>b</sup>      | Thinness<br>(n=102; 6.9%) | P value <sup>b</sup> |
|--------------------------------------------------------------------------------------------------------------------------------------------------------------------------------------------------------------------------------------------------------------------------------------------------------------------------------------------------------------------------------------------------------------------------------------------------------------------------------------------------------------------------------------------------------------------------------------------------------------------------------------------------------------------------------------------------------------------------------------------------------------------------------------------------------------------------|-------------------|--------------------------------|---------------------------|----------------------|----------------------|-------------------------|---------------------------|---------------------------|----------------------|
| <b>Anthropometric</b>                                                                                                                                                                                                                                                                                                                                                                                                                                                                                                                                                                                                                                                                                                                                                                                                    |                   |                                |                           |                      |                      |                         |                           |                           |                      |
| HAZ                                                                                                                                                                                                                                                                                                                                                                                                                                                                                                                                                                                                                                                                                                                                                                                                                      | -0.94 ± 1.07      | -0.65 ± 0.82                   | -2.67 ± 0.62              | <0.01                | -0.99 ± 1            | -0.46 ± 1.2             | <0.01                     | -1.38 ± 1.07              | 0.02                 |
| BAZ                                                                                                                                                                                                                                                                                                                                                                                                                                                                                                                                                                                                                                                                                                                                                                                                                      | -0.31 ± 1.22      | -0.23 ± 1.2                    | -0.78 ± 1.21              | <0.01                | -0.42 ± 0.79         | 1.56 ± 0.46             | <0.01                     | -2.61 ± 0.52              | <0.01                |
| <b>Biomarkers</b>                                                                                                                                                                                                                                                                                                                                                                                                                                                                                                                                                                                                                                                                                                                                                                                                        |                   |                                |                           |                      |                      |                         |                           |                           |                      |
| Haemoglobin (g/dL)                                                                                                                                                                                                                                                                                                                                                                                                                                                                                                                                                                                                                                                                                                                                                                                                       | 13.06 ± 1.03      | 13.10 ± 0.97                   | 12.79 ± 1.25              | 0.09                 | 13.06 ± 1.04         | 13.12 ± 0.98            | 0.39                      | 12.9 ± 1                  | 0.13                 |
| Serum ferritin (µg/L)<br>(geometric mean ± SE) <sup>c</sup>                                                                                                                                                                                                                                                                                                                                                                                                                                                                                                                                                                                                                                                                                                                                                              | 54.76 ± 1.16      | 56.78 ± 1.58                   | 52.76 ± 5.45              | 0.51                 | 53.69 ± 1.90         | 54.43 ± 2.43            | 0.85                      | 67.47 ± 4.41              | <0.01                |
| Serum transferrin receptor<br>(mg/L)                                                                                                                                                                                                                                                                                                                                                                                                                                                                                                                                                                                                                                                                                                                                                                                     | 5.87 ± 2.55       | 5.71 ± 1.85                    | 6.55 ± 4.61               | 0.13                 | 5.87 ± 2.55          | 5.94 ± 2.6              | 0.77                      | 5.64 ± 2.32               | 0.26                 |
| Serum zinc (µmol/L)                                                                                                                                                                                                                                                                                                                                                                                                                                                                                                                                                                                                                                                                                                                                                                                                      | 11.37 ± 5.32      | 11.39 ± 5.22                   | 11.3 ± 6.21               | 0.89                 | 11.35 ± 5.5          | 11.51 ± 5.07            | 0.72                      | 11.12 ± 4.39              | 0.74                 |
| Serum retinol (µmol/L)                                                                                                                                                                                                                                                                                                                                                                                                                                                                                                                                                                                                                                                                                                                                                                                                   | 1.25 ± 0.29       | 1.25 ± 0.29                    | 1.22 ± 0.31               | 0.43                 | 1.25 ± 0.29          | 1.27 ± 0.3              | 0.58                      | 1.14 ± 0.28               | <0.01                |
| RBP (µmol/L)                                                                                                                                                                                                                                                                                                                                                                                                                                                                                                                                                                                                                                                                                                                                                                                                             | 1.37 ± 0.44       | 1.37 ± 0.45                    | 1.35 ± 0.39               | 0.55                 | 1.38 ± 0.45          | 1.39 ± 0.44             | 0.77                      | 1.18 ± 0.3                | <0.01                |
| CRP (mg/L)                                                                                                                                                                                                                                                                                                                                                                                                                                                                                                                                                                                                                                                                                                                                                                                                               | 0.62 ± 2.79       | 0.62 ± 2.54                    | 0.85 ± 4.9                | 0.56                 | 0.49 ± 2.6           | 0.86 ± 2.65             | 0.12                      | 0.94 ± 4.51               | 0.46                 |
| AGP (mg/L)                                                                                                                                                                                                                                                                                                                                                                                                                                                                                                                                                                                                                                                                                                                                                                                                               | 0.56 ± 0.25       | 0.56 ± 0.24                    | 0.59 ± 0.32               | 0.34                 | 0.55 ± 0.24          | 0.59 ± 0.26             | 0.13                      | 0.51 ± 0.25               | 0.23                 |
| <b>MNDs</b>                                                                                                                                                                                                                                                                                                                                                                                                                                                                                                                                                                                                                                                                                                                                                                                                              |                   |                                |                           |                      |                      |                         |                           |                           |                      |
|                                                                                                                                                                                                                                                                                                                                                                                                                                                                                                                                                                                                                                                                                                                                                                                                                          | Total<br>(n=1471) | Non-stunted<br>(n=1068; 85.7%) | Stunted<br>(n=185; 14.3%) | P value              | NW<br>(n=967; 65.9%) | OW<br>(n=402; 27.2%)    | Thinness<br>(n=102; 6.9%) | P value                   |                      |
| Anaemia                                                                                                                                                                                                                                                                                                                                                                                                                                                                                                                                                                                                                                                                                                                                                                                                                  | 143 (9.5%)        | 94 (8.8%)                      | 29 (14.8%)                | 0.07                 | 97 (10%)             | 34 (7.1%)               | 12 (13.8%)                | 0.14                      |                      |
| ID                                                                                                                                                                                                                                                                                                                                                                                                                                                                                                                                                                                                                                                                                                                                                                                                                       | 136 (9.8%)        | 93 (8.6%)                      | 17 (9.9%)                 | 0.66                 | 94 (10%)             | 39 (11.3%)              | 3 (2.1%)                  | 0.17                      |                      |
| IDA                                                                                                                                                                                                                                                                                                                                                                                                                                                                                                                                                                                                                                                                                                                                                                                                                      | 62 (4.2%)         | 39 (3.5%)                      | 12 (6.3%)                 | 0.07                 | 43 (4.5%)            | 18 (4.4%)               | 1 (1.1%)                  | 0.43                      |                      |
| Low serum zinc                                                                                                                                                                                                                                                                                                                                                                                                                                                                                                                                                                                                                                                                                                                                                                                                           | 563 (39.8%)       | 397 (39.5%)                    | 83 (49.6%)                | 0.11                 | 375 (41.5%)          | 151 (35.1%)             | 37 (42.5%)                | 0.21                      |                      |
| Low serum retinol                                                                                                                                                                                                                                                                                                                                                                                                                                                                                                                                                                                                                                                                                                                                                                                                        | 16 (1.5%)         | 9 (1.0%)                       | 3 (3.8%)                  | 0.04                 | 7 (0.8%)             | 6 (1.7%)                | 3 (7.0%)                  | <0.01                     |                      |
| Chronic or acute inflammation                                                                                                                                                                                                                                                                                                                                                                                                                                                                                                                                                                                                                                                                                                                                                                                            | 82 (5.9%)         | 57 (5.3%)                      | 12 (6.8%)                 | 0.51                 | 49 (4.6%)            | 28 (9%)                 | 5 (5%)                    | 0.09                      |                      |
| <b>Number of any MNDs<sup>d</sup></b>                                                                                                                                                                                                                                                                                                                                                                                                                                                                                                                                                                                                                                                                                                                                                                                    |                   |                                |                           |                      |                      |                         |                           |                           |                      |
| 0                                                                                                                                                                                                                                                                                                                                                                                                                                                                                                                                                                                                                                                                                                                                                                                                                        | 412 (53.9%)       | 369 (56.3%)                    | 43 (38.3%)                | <b>&lt;0.01</b>      | 306 (52.3%)          | 135 (60.7%)             | 33 (48.7%)                | 0.37                      |                      |
| 1                                                                                                                                                                                                                                                                                                                                                                                                                                                                                                                                                                                                                                                                                                                                                                                                                        | 306 (41.6%)       | 262 (39.8%)                    | 44 (53.3%)                |                      | 239 (43.1%)          | 92 (34.0%)              | 23 (47.6%)                |                           |                      |
| 2                                                                                                                                                                                                                                                                                                                                                                                                                                                                                                                                                                                                                                                                                                                                                                                                                        | 30 (4.4%)         | 22 (3.8%)                      | 8 (8.4%)                  |                      | 24 (4.5%)            | 11 (4.6%)               | 2 (3.7%)                  |                           |                      |
| 3                                                                                                                                                                                                                                                                                                                                                                                                                                                                                                                                                                                                                                                                                                                                                                                                                        | 1 (0.1%)          | 1 (0.1%)                       | 0 (0%)                    |                      | 1 (0.1%)             | 2 (0.7%)                | 0 (0%)                    |                           |                      |
| <p>Data are presented as mean ± SD for continuous variables and n (%) for categorical variables unless specific noted.<br/> Wald test and Chi square test were performed for continuous variables (anthropometric, biomarkers) and categorical variables (MNDs and number of any MNDs), respectively.<br/> <sup>a</sup>P value was calculated comparing with non-stunted group; <sup>b</sup>P value was calculated comparing with normal weight group; <sup>c</sup>P value was calculated based on a univariate regression model; <sup>d</sup>Participants with numbers of any following MNDs: ID, Low serum zinc and retinol.<br/> AGP: alpha-1 acid glycoprotein; BAZ: BMI-for-age z score; CRP: C-reactive protein; HAZ: height-for-age z score; NW: normal weight; OW: overweight; RBP: retinol binding protein.</p> |                   |                                |                           |                      |                      |                         |                           |                           |                      |

**Table 3 Unadjusted binominal and multi-nominal logistic regression between micronutrient status and body weight status among female adolescents aged 10 to 18 years old living in Vietnam (n=1471).**

|                                     | Individual MNDs <sup>a</sup> |                             |                             |                           |                             | Any MNDs <sup>b</sup>      |                              |
|-------------------------------------|------------------------------|-----------------------------|-----------------------------|---------------------------|-----------------------------|----------------------------|------------------------------|
|                                     | Anaemia                      | ID                          | IDA                         | Low serum zinc            | Low serum retinol           | 1 MND                      | ≥2MNDs                       |
|                                     | COR [95% CI]                 | COR [95% CI]                | COR [95% CI]                | COR [95% CI]              | COR [95% CI]                | CRR [95% CI]               | CRR [95% CI]                 |
| Age group (ref:10-12 y)             | 1                            | 1                           | 1                           | 1                         | 1                           | 1                          | 1                            |
| 13-15 y                             | 1.78 [0.94, 3.38]            | <b>2.93 [1.68, 5.12]**</b>  | 2.72 [0.92, 8.06]           | 0.93 [0.73, 1.17]         | 1.00 [0.25, 4.04]           | 1.05 [0.77, 1.43]          | 2.03 [0.62, 6.69]            |
| 16-18 y                             | <b>2.24 [1.40, 3.60]**</b>   | <b>4.73 [2.20, 10.17]**</b> | <b>4.55 [1.94, 10.68]**</b> | 1.39 [0.88, 2.20]         | 0.54 [0.04, 6.93]           | 1.38 [0.57, 3.31]          | <b>4.55 [1.27, 16.28]*</b>   |
| Ethnicity (ref: Kinh)               | 1                            | 1                           | 1                           | 1                         | 1                           | 1                          | 1                            |
| Minorities                          | 1.81 [0.92, 3.54]            | 0.74 [0.32, 1.71]           | 1.09 [0.44, 2.7]            | <b>1.63 [1.08, 2.47]*</b> | 1.47 [0.56, 3.81]           | 1.55 [1.00, 2.43]          | 1.32 [0.49, 3.57]            |
| Area of residence (ref: Urban)      | 1                            | 1                           | 1                           | 1                         | 1                           | 1                          | 1                            |
| rural                               | 1.34 [0.61, 2.96]            | 1.32 [0.74, 2.35]           | 1.46 [0.66, 3.23]           | 1.39 [0.74, 2.61]         | 1.64 [0.40, 6.69]           | 1.22 [0.69, 2.15]          | 1.69 [0.49, 5.81]            |
| Wealth index (ref: Lowest)          | 1                            | 1                           | 1                           | 1                         | 1                           | 1                          | 1                            |
| Second                              | 1.03 [0.63, 1.69]            | 1.59 [0.86, 2.94]           | 1.33 [0.59, 3.01]           | 0.95 [0.46, 1.95]         | 1.72 [0.38, 7.78]           | 1.41 [0.68, 2.95]          | 1.77 [0.62, 5.03]            |
| Third                               | <b>0.42 [0.23, 0.77]*</b>    | 0.77 [0.34, 1.74]           | 0.62 [0.18, 2.09]           | <b>0.48 [0.3, 0.77]**</b> | 1.75 [0.30, 10.18]          | 0.73 [0.43, 1.22]          | 0.23 [0.04, 1.29]            |
| Fourth                              | 0.52 [0.26, 1.04]            | 1.32 [0.61, 2.86]           | 0.95 [0.40, 2.22]           | 0.89 [0.57, 1.38]         | 0.38 [0.06, 2.42]           | 1.42 [0.86, 2.33]          | 0.51 [0.21, 1.24]            |
| Highest                             | <b>0.29 [0.14, 0.61]**</b>   | <b>0.26 [0.11, 0.63]*</b>   | <b>0.42 [0.22, 0.81]*</b>   | 0.59 [0.27, 1.29]         | 0.72 [0.08, 6.18]           | 0.84 [0.43, 1.65]          | 0.31 [0.07, 1.30]            |
| Inflammation (ref: no inflammation) | 1                            | 1                           | 1                           | 1                         | 1                           | 1                          | 1                            |
| Chronic or acute inflammation       | <b>2.03 [1.03, 4.01]*</b>    | <b>4.11 [2.18, 7.76]**</b>  | 1.50 [0.50, 4.53]           | 1.63 [0.86, 3.07]         | <b>7.86 [1.61, 38.30]*</b>  | 1.42 [0.60, 3.36]          | <b>11.44 [3.56, 36.79]**</b> |
| Growth indices                      | 1                            | 1                           | 1                           | 1                         | 1                           | 1                          | 1                            |
| Stunted (ref: non-stunted)          | 1.81 [0.93, 3.51]            | 1.17 [0.55, 2.49]           | 1.85 [0.94, 3.65]           | 1.51 [0.90, 2.53]         | 3.96 [0.97, 16.18]          | <b>1.97 [1.21, 3.20]**</b> | <b>3.16 [1.09, 9.19]*</b>    |
| Overweight (ref: normal weight)     | 0.68 [0.40, 1.18]            | 1.14 [0.57, 2.27]           | 0.96 [0.42, 2.20]           | <b>0.76 [0.59, 0.99]*</b> | 2.04 [0.81, 5.12]           | 0.68 [0.41, 1.12]          | 1.00 [0.44, 2.29]            |
| Thinness (ref: normal weight)       | 1.44 [0.74, 2.8]             | <b>0.19 [0.04, 0.83]*</b>   | 0.24 [0.03, 2.11]           | 1.04 [0.56, 1.95]         | <b>9.15 [2.28, 36.68]**</b> | 1.18 [0.56, 2.51]          | 0.86 [0.13, 5.59]            |

<sup>a</sup>Anaemia was defined as haemoglobin <115 g/L and <120 g/L for 10-11 years old and 12-18 years old, respectively. ID was defined as serum ferritin <15 µg/L or 70 µg/L for apparently healthy individuals and individuals with infection or inflammation [CRP >5 mg/L and/or AGP >1 mg/L], respectively; IDA was defined as the co-existence of anaemia and ID. Low serum zinc was defined as serum zinc under different conditions according to IZiNCG; Low serum retinol were defined as serum retinol concentration <0.70 µmol/L.

<sup>b</sup>Any MNDs referred to having any of the following micronutrient deficiencies: iron deficiency, low serum zinc or retinol.

CI: confidence interval; COR: crude odds ratio; CRR: crude relative risk; ID: iron deficiency; IDA: iron deficiency anaemia; MND: micronutrient deficiencies.

\*:p<0.05; \*\*:p<0.01.



**Table 4 Adjusted binominal and multi-nominal logistic regressions between micronutrient status and growth indices among female adolescents aged between 10 to 18 years old (n=1471).**

|               | Individual MNDs <sup>1</sup> |                           |                   |                   |                              | Any MNDs <sup>2</sup>     |                   |
|---------------|------------------------------|---------------------------|-------------------|-------------------|------------------------------|---------------------------|-------------------|
|               | Anaemia                      | ID                        | IDA               | Low serum zinc    | Low serum retinol            | 1 MND                     | ≥2 MNDs           |
|               | AOR [95% CI]                 | AOR [95% CI]              | AOR [95% CI]      | AOR [95% CI]      | AOR [95% CI]                 | ARR [95% CI]              | ARR [95% CI]      |
| Non-stunted   | 1                            | 1                         | 1                 | 1                 | 1                            | 1                         | 1                 |
| Stunted       | 1.42 [0.80, 2.51]            | 1.03 [0.50, 2.11]         | 1.51 [0.59, 3.91] | 1.54 [0.91, 2.61] | <b>8.92 [2.26, 35.15]**</b>  | <b>1.88 [1.13, 3.12]*</b> | 2.30 [0.60, 8.86] |
| Normal weight | 1                            | 1                         | 1                 | 1                 | 1                            | 1                         | 1                 |
| Overweight    | 0.68 [0.36, 1.31]            | 1.16 [0.55, 2.44]         | 1.23 [0.46, 3.27] | 0.79 [0.58, 1.06] | 3.57 [0.78, 16.38]           | 0.68 [0.40, 1.13]         | 0.98 [0.42, 2.27] |
| Thinness      | 1.71 [0.97, 2.99]            | <b>0.22 [0.05, 0.99]*</b> | 0.35 [0.04, 3.45] | 1.15 [0.58, 2.28] | <b>12.25 [3.47, 43.33]**</b> | 1.26 [0.56, 2.83]         | 1.1 [0.17, 7.13]  |

All analyses were adjusted for confounders including age, ethnicity, area, wealth index, and inflammation.

<sup>1</sup>Anaemia was defined as haemoglobin <115 g/L and <120 g/L for 10-11 years old and 12-18 years old, respectively. ID was defined as serum ferritin <15µg/L or 70µg/L for apparently healthy individuals and individuals with infection or inflammation [CRP >5mg/L and/or AGP >1mg/L], respectively; IDA was defined as the co-existence of anaemia and ID. Low serum zinc was defined as serum zinc under different conditions according to IZiNCG; Low serum retinol were defined as serum retinol concentration <0.70µmol/L.

<sup>2</sup>Any MNDs referred to having any of the following micronutrient deficiencies: iron deficiency, low serum zinc or retinol.

AOR: adjusted odds ratio; ARR: adjusted relative risk; CI: confidence interval; ID: iron deficiency; IDA: iron deficiency anaemia; MND: micronutrient deficiencies.

\*:p<0.05; \*\*:p<0.01.

## References

1. Han X, Ding S, Lu J, Li Y. Global, regional, and national burdens of common micronutrient deficiencies from 1990 to 2019: A secondary trend analysis based on the Global Burden of Disease 2019 study. *EClinicalMedicine* 2022; **44**: 101299. doi: 10.1016/j.eclinm.2022.101299.
2. Stevens GA, Beal T, Mbuya MNN, Luo H, Neufeld LM, Global Micronutrient Deficiencies Research G. Micronutrient deficiencies among preschool-aged children and women of reproductive age worldwide: a pooled analysis of individual-level data from population-representative surveys. *Lancet Glob Health* 2022; **10**(11): e1590-e9. doi: 10.1016/S2214-109X(22)00367-9.
3. Norris SA, Frongillo EA, Black MM, et al. Nutrition in adolescent growth and development. *Lancet* 2022; **399**(10320): 172-84. doi: 10.1016/S0140-6736(21)01590-7.
4. Christian P, Smith ER. Adolescent Undernutrition: Global Burden, Physiology, and Nutritional Risks. *Ann Nutr Metab* 2018; **72**(4): 316-28. doi: 10.1159/000488865.
5. Mai TMT, Pham NO, Tran TMH, et al. The double burden of malnutrition in Vietnamese school-aged children and adolescents: a rapid shift over a decade in Ho Chi Minh City. *Eur J Clin Nutr* 2020; **74**(10): 1448-56. doi: 10.1038/s41430-020-0587-6.
6. Harris J, Nguyen PH, Tran LM, Huynh PN. Nutrition transition in Vietnam: changing food supply, food prices, household expenditure, diet and nutrition outcomes. *Food Secur* 2020; **12**(5): 1141-55. doi: 10.1007/s12571-020-01096-x.
7. Van Minh H, Khuong DQL, Tran TA, Do HP, Watson F, Lobstein T. Childhood Overweight and Obesity in Vietnam: A Landscape Analysis of the Extent and Risk Factors. *INQUIRY-J HEALTH CAR* 2023; **60**: 00469580231154651. doi: 10.1177/00469580231154651.
8. Government of Vietnam. National Nutrition Strategy for 2011–2020 with a vision toward 2030. Hanoi: Medical Publishing House; 2012. Available from: <https://viendinhduong.vn/FileUpload/Documents/2.%20National%20Nutrition%20%20Strategy%20011-2020.pdf>.
9. Tran VK, Spohrer R, Le TD, Poonawala A, Monech-Pfanner R. Micronutrient Deficiency Control in Vietnam from Policy and Research to Implementation: Keys for Success, Challenges and Lessons Learned. *J Nutr Sci Vitaminol (Tokyo)* 2015; **61 Suppl**: S198-200. doi: 10.3177/jnsv.61.S198.
10. Kien NT, Duc TQ, Chi VTQ, Quang PN, Tuyen BTT, Hoa DTP. Declining trend in anemia prevalence among non-pregnant women of reproductive age in Vietnam over two decades: A systematic review and meta-analysis of population studies. *Health Promot Perspect* 2022; **12**(3): 231-9. doi: 10.34172/hpp.2022.30.
11. Roos N, Ponce MC, Doak CM, et al. Micronutrient status of populations and preventive nutrition interventions in South East Asia. *Matern Child Health J* 2019; **23**(Suppl 1): 29-45. doi: 10.1007/s10995-018-2639-2.
12. [Preprint] Pui Yee Tan, Som SV, Nguyen SD, et al. Demographic variation and socioeconomic inequalities associated with the triple burden of malnutrition in Vietnamese children aged 6 months to 9 years old: Findings from the Vietnamese General Nutrition Survey 2020. *medRxiv* 2024: 2024.03.18.24304456. doi: 10.1101/2024.03.18.24304456.
13. de Onis M, Onyango AW, Borghi E, Siyam A, Nishida C, Siekmann J. Development of a WHO growth reference for school-aged children and adolescents. *Bull World Health Organ* 2007; **85**(9): 660-7. doi: 10.2471/blt.07.043497.
14. Centers for Disease Control and Prevention WHO, Nutrition International, UNICEF,. Micronutrient survey manual. Geneva: World Health Organization; 2020. Available from: <https://iris.who.int/bitstream/handle/10665/336010/9789240012691-eng.pdf?sequence=1>.
15. International Zinc Nutrition Consultative Group. Assessing population zinc status with serum zinc concentration; 2012. Available from: [https://static1.squarespace.com/static/56424f6ce4b0552eb7fdc4e8/t/5774378f414fb5410541b748/1467234199261/IZiNCG\\_TechBrief2\\_2012-3.pdf](https://static1.squarespace.com/static/56424f6ce4b0552eb7fdc4e8/t/5774378f414fb5410541b748/1467234199261/IZiNCG_TechBrief2_2012-3.pdf).
16. Shoham J. Vietnam National Nutrition Strategy 2021 - 2030 with vision to 2040; 2021. Available from: <https://www.n4d.group/wp-content/uploads/2023/02/Vietnam-National-Nutrition-Strategy.pdf>.

17. Aurino E, Fernandes M, Penny ME. The nutrition transition and adolescents' diets in low- and middle-income countries: a cross-cohort comparison. *Public Health Nutr* 2017; **20**(1): 72-81. doi: 10.1017/S1368980016001865.
18. Le HN, Nguyen KV, Phung H, Hoang NTD, Tran DT, Mwanri L. Household Dietary Diversity among the Ethnic Minority Groups in the Mekong Delta: Evidence for the Development of Public Health and Nutrition Policy in Vietnam. *International Journal of Environmental Research and Public Health* 2023; **20**(2): 932. doi: 10.3390/ijerph20020932.
19. Harris J, Huynh P, Nguyen HT, et al. Nobody left behind? Equity and the drivers of stunting reduction in Vietnamese ethnic minority populations. *Food Secur* 2021; **13**(4): 803-18. doi: 10.1007/s12571-021-01183-7.
20. Krishna A, Oh J, Lee JK, et al. Short-term and long-term associations between household wealth and physical growth: a cross-comparative analysis of children from four low- and middle-income countries. *Glob Health Action* 2015; **8**: 26523. doi: 10.3402/gha.v8.26523.
21. Carrillo-Larco RM, Miranda JJ, Bernabe-Ortiz A. Wealth index and risk of childhood overweight and obesity: evidence from four prospective cohorts in Peru and Vietnam. *Int J Public Health* 2016; **61**(4): 475-85. doi: 10.1007/s00038-015-0767-7.
22. Khan NC, Khoi HH, Giay T, et al. Control of vitamin A deficiency in Vietnam: achievements and future orientation. *Food Nutr Bull* 2002; **23**(2): 133-42. doi: 10.1177/156482650202300202.
23. Tan X, Tan PY, Gong YY, Moore JB. Overnutrition is a risk factor for iron, but not for zinc or vitamin A deficiency in children and young people: a systematic review and meta-analysis. *BMJ Glob Health* 2024; **0**: e015135. doi: 10.1136/bmjgh-2024-015135.
24. Sawyer SM, Afifi RA, Bearinger LH, et al. Adolescence: a foundation for future health. *Lancet* 2012; **379**(9826): 1630-40. doi: 10.1016/S0140-6736(12)60072-5.
25. Das JK, Lassi ZS, Hoodbhoy Z, Salam RA. Nutrition for the Next Generation: Older Children and Adolescents. *Ann Nutr Metab* 2018; **72 Suppl 3**(Suppl. 3): 56-64. doi: 10.1159/000487385.
26. Tang GH, Sholzberg M. Iron deficiency anemia among women: An issue of health equity. *Blood Rev* 2024; **64**: 101159. doi: 10.1016/j.blre.2023.101159.
27. Rahman MM, de Silva A, Sassa M, Islam MR, Aktar S, Akter S. A systematic analysis and future projections of the nutritional status and interpretation of its drivers among school-aged children in South-East Asian countries. *Lancet Reg Health Southeast Asia* 2023; **16**: 100244. doi: 10.1016/j.lansea.2023.100244.
28. Laillou A, Yakes E, Le TH, et al. Intra-individual double burden of overweight and micronutrient deficiencies among Vietnamese women. *PLoS One* 2014; **9**(10): e110499. doi: 10.1371/journal.pone.0110499.

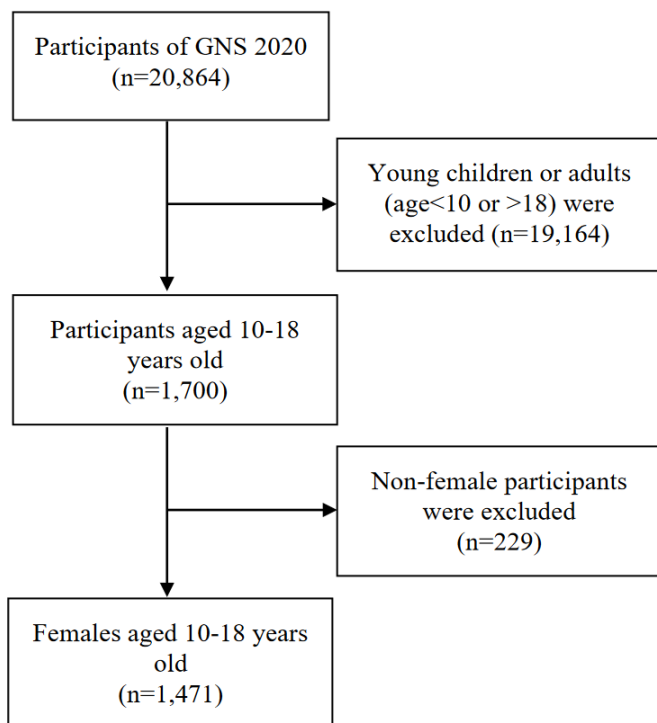

**Figure 1** Participants selection flow chart.

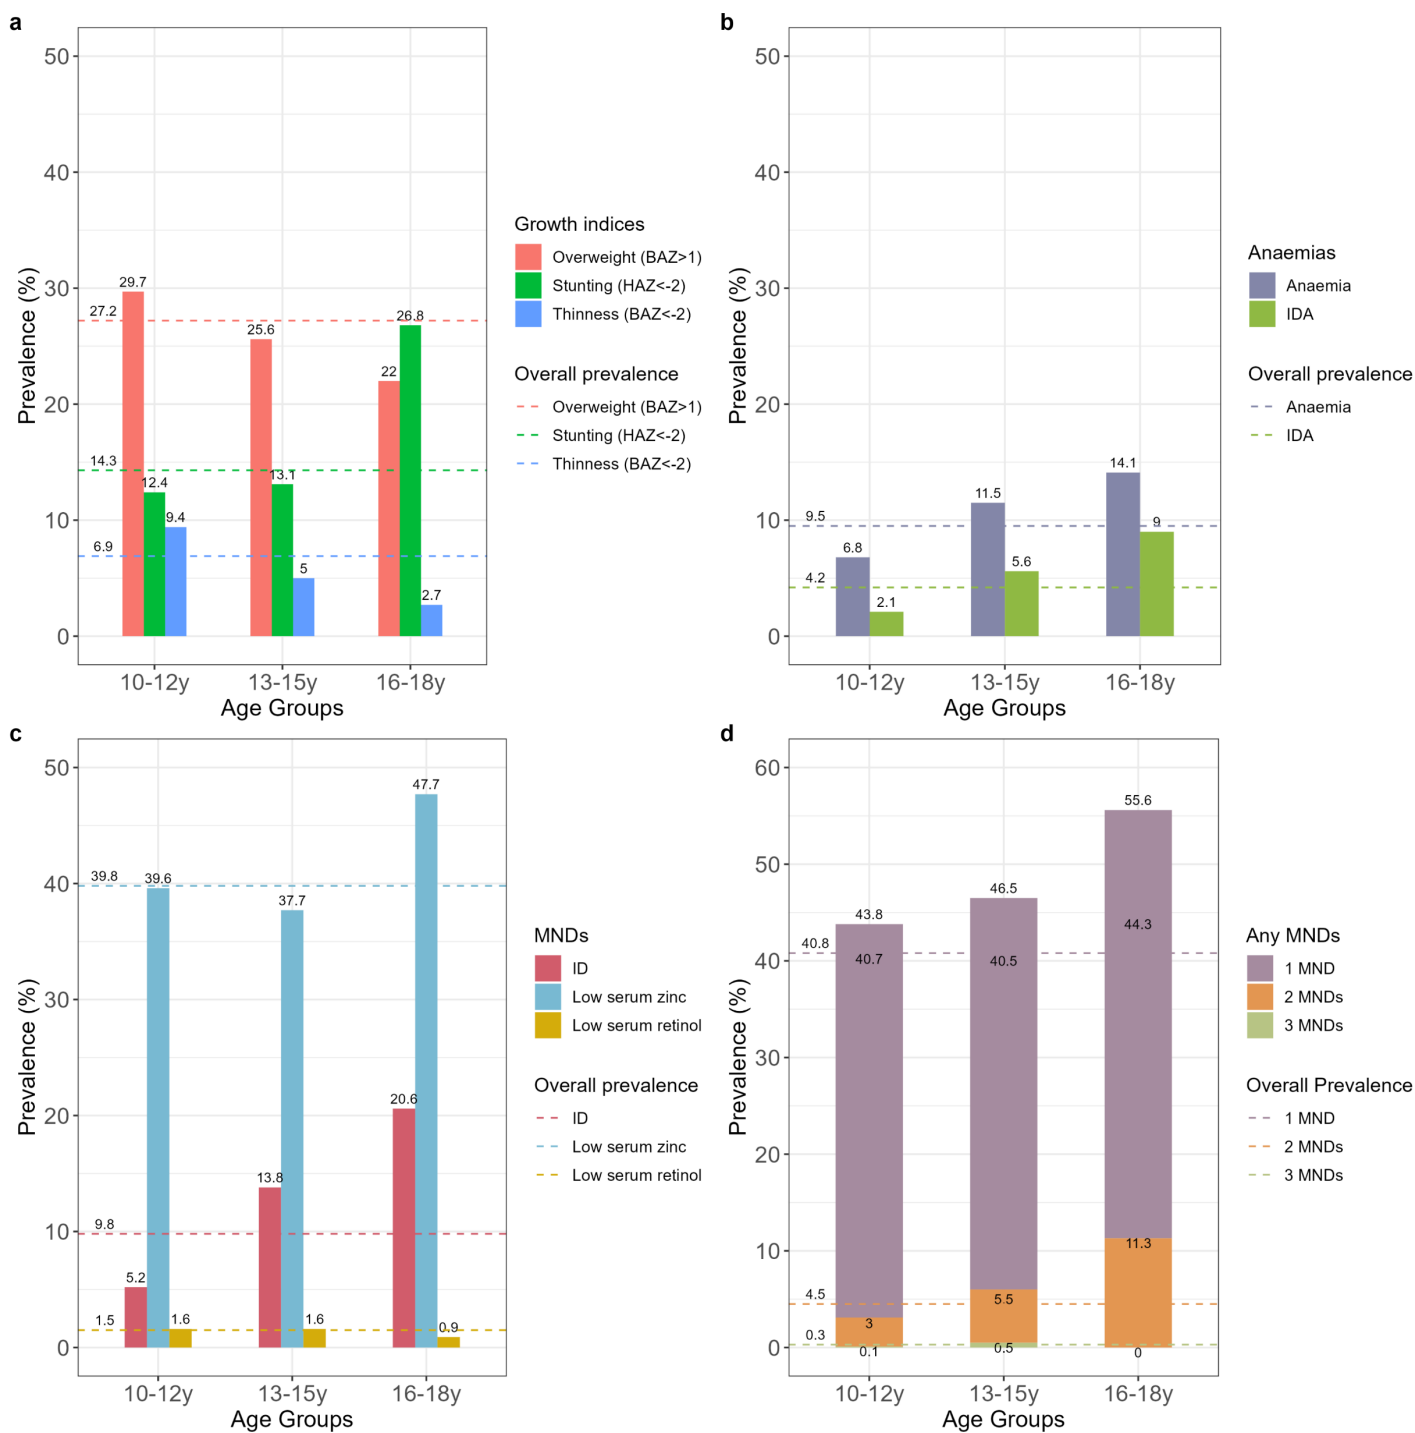

**Figure 2** Prevalence of malnutrition in female adolescents aged 10-18 years old living in Vietnam in different age groups. Data show the prevalence of overweight, stunting and thinness (a), anaemias (b), MNDs (c) and distribution of any MNDs (any of ID, low serum zinc or low serum retinol) (d). Prevalence was estimated based on sampling weight. Dash lines represented the overall prevalence. ID: iron deficiency; IDA: iron deficiency anaemia; MNDs: micronutrient deficiencies.
