# Supplementary material for: Micronutrient deficiencies and the double burden of malnutrition in Vietnamese female adolescents: a national cross-sectional study in 2020
Source: bioRxiv or medRxiv preprint supplement (doi:10.1101/2024.04.11.24305546), 2024-04-12
Supplement: Supplementary file [file media-1.pdf]

## SUPPLEMENTARY MATERIAL

Micronutrient deficiencies and the double burden of malnutrition in Vietnamese female adolescents: a national cross-sectional study in 2020

### Authors

X. Tan, P.Y. Tan, S.V. Som, S.D. Nguyen, D.T. Tran, N.T. Tran, V.K. Tran, J. B. Moore\* and Y. Y. Gong

\*Corresponding Author: [J.B.Moore@leeds.ac.uk](mailto:J.B.Moore@leeds.ac.uk)

### Table of Contents

|                                                                                                 |   |
|-------------------------------------------------------------------------------------------------|---|
| <b>Table S1</b> Number and percentage missed observations in dataset. ....                      | 2 |
| <b>Figure S1</b> Prevalence of overweight, stunting and thinness in rural and urban areas. .... | 3 |
| <b>Figure S2</b> Prevalence of micronutrient deficiencies in rural and urban areas. ....        | 4 |
| <b>Figure S3</b> Prevalence of any MNDs in rural and urban areas. ....                          | 5 |

**Tan et al. Supplementary material**

**Table S1 Number and percentage missed observations in dataset.**

|                                | <b>Variable</b>     | <b>Number of observations</b> | <b>Number of missed observations</b> | <b>Percentage of missed observations</b> |
|--------------------------------|---------------------|-------------------------------|--------------------------------------|------------------------------------------|
| <b>Age</b>                     | age in year         | 1471                          | 0                                    | 0.0                                      |
| <b>Anthropometry</b>           | body weight         | 1471                          | 0                                    | 0.0                                      |
|                                | body height         | 1253                          | 218                                  | 14.8                                     |
| <b>MNDs &amp; inflammation</b> | anemia              | 1396                          | 75                                   | 5.1                                      |
|                                | ID                  | 1296                          | 175                                  | 11.9                                     |
|                                | IDA                 | 1396                          | 75                                   | 5.1                                      |
|                                | low serum zinc      | 1389                          | 82                                   | 5.6                                      |
|                                | low serum retinol   | 1133                          | 338                                  | 23.0                                     |
|                                | number of MNDs      | 868                           | 603                                  | 41.0                                     |
|                                | inflammation status | 1297                          | 174                                  | 11.8                                     |
| <b>Socioeconomic</b>           | ecological region   | 1471                          | 0                                    | 0.0                                      |
|                                | residence of living | 1471                          | 0                                    | 0.0                                      |
|                                | ethnicity           | 1471                          | 0                                    | 0.0                                      |
|                                | wealth index        | 1471                          | 0                                    | 0.0                                      |
| <b>Others</b>                  | puberty             | 212                           | 1259                                 | 85.6                                     |

ID: iron deficiency; IDA: iron deficiency anaemia.

FIGURE S1

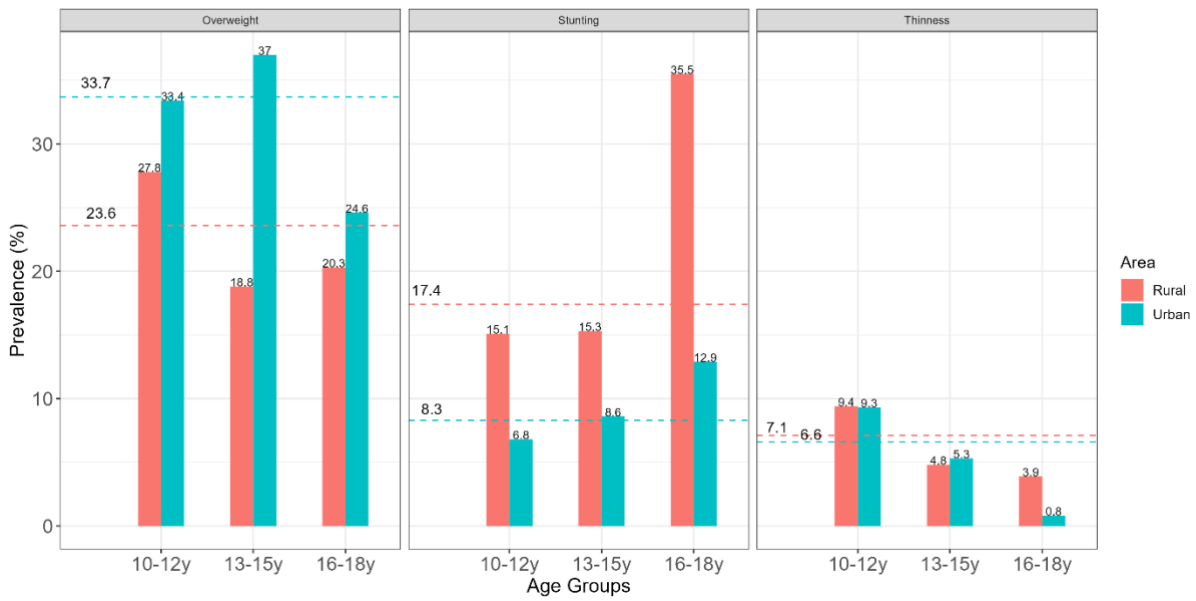

**Figure S1 Prevalence of overweight, stunting and thinness in rural and urban areas.** Overweight: BMI-for-age z score (BAZ) > +1 SD, stunting: height-for-age z score (HAZ) < -1 SD, thinness: BAZ < -2 SD. Prevalence was estimated based on sampling weights. Bars represent the prevalence in each age groups. Dashed lines illustrate the overall prevalence.

FIGURE S2

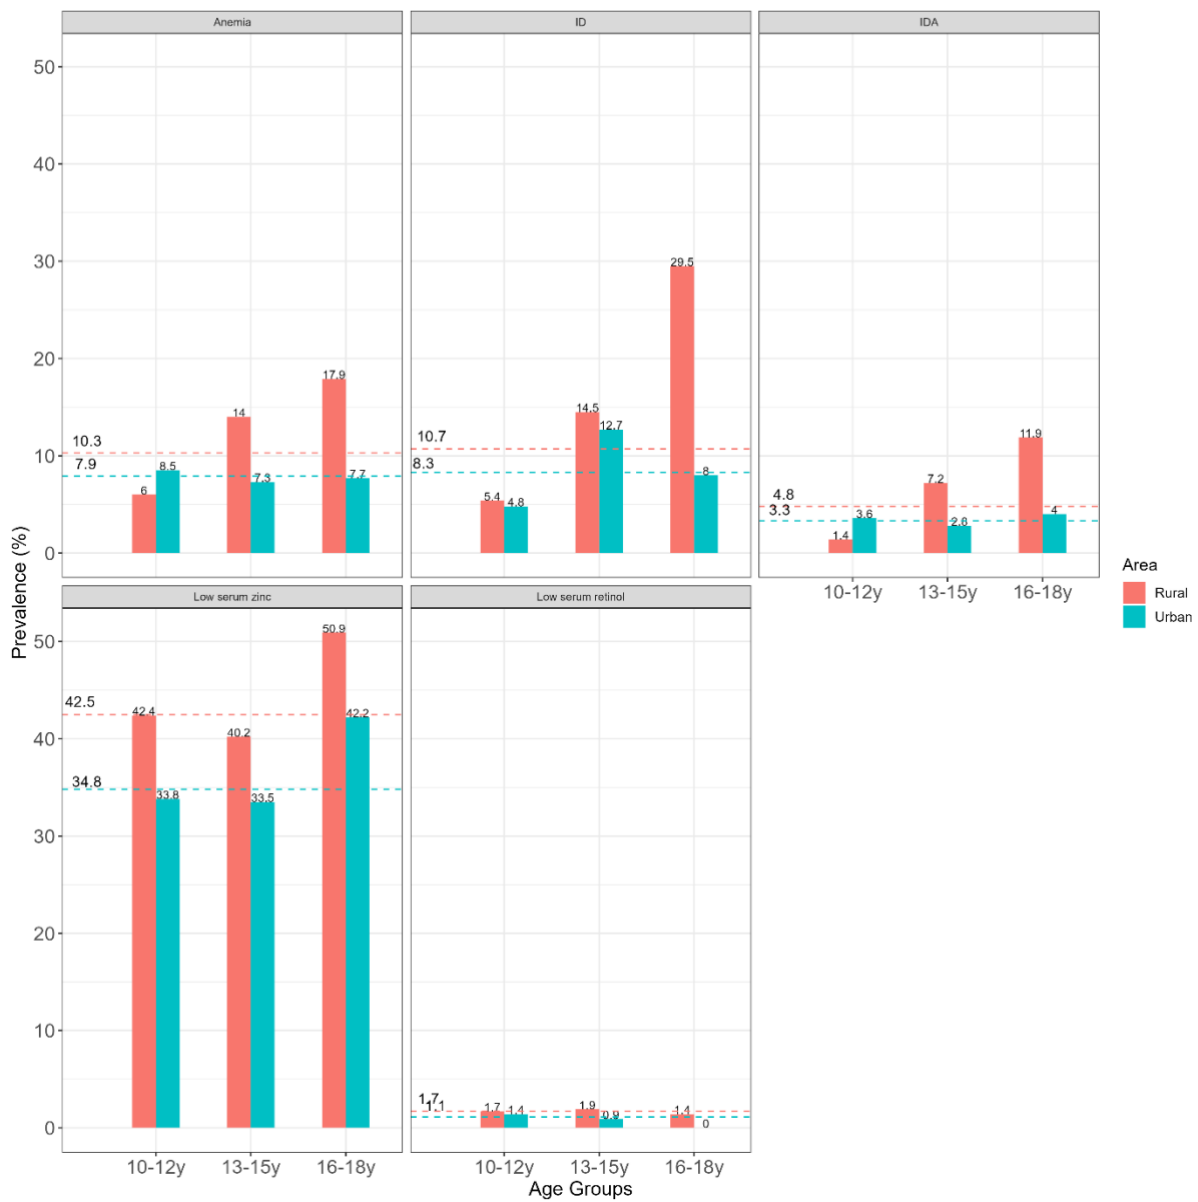

Figure S2 Prevalence of micronutrient deficiencies in rural and urban areas. ID: iron deficiency, IDA: iron deficiency anaemia.

FIGURE S3

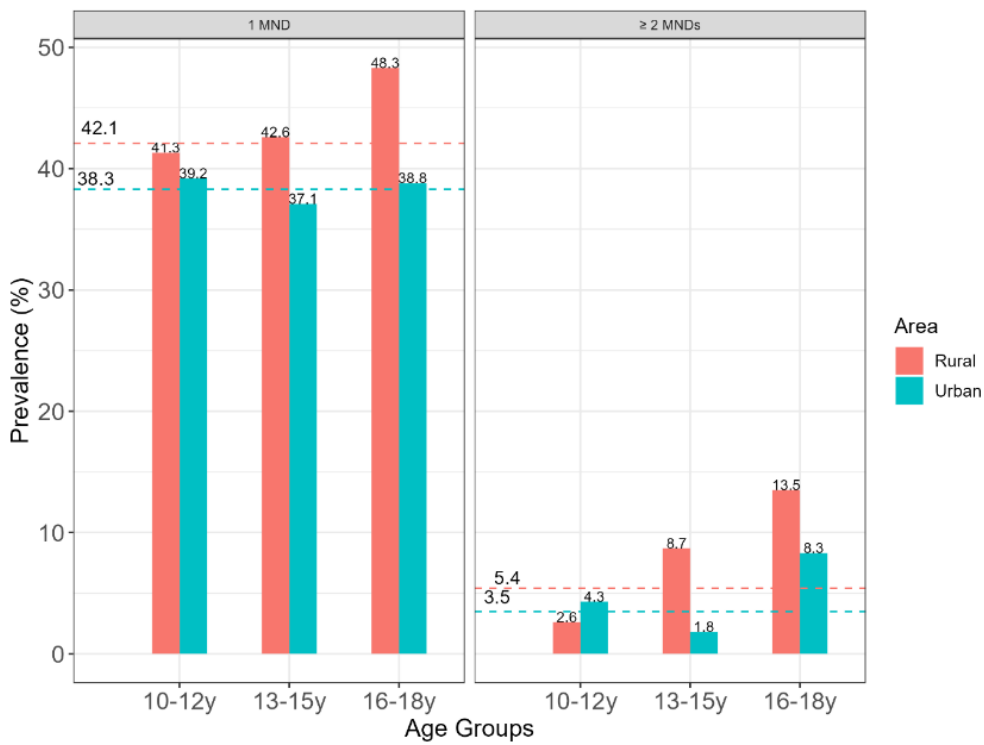

**Figure S3 Prevalence of any MNDs in rural and urban areas.** MNDs included any of: iron deficiency, low serum zinc and low serum retinol.
